# Supplementary material for: Catalytic metal-free ketone hydrogenation: a computational experiment
Source: Royal Society of Chemistry journal article supplement (doi:10.1039/c001399d), 2010-01-01
Supplement: c001399d.pdf [file c001399d.pdf]

## Supporting Information

# Catalytic Metal-Free Ketone Hydrogenation: A Computational Experiment

Haixia Li, Lili Zhao, Gang Lu, Fang Huang, and Zhi-Xiang Wang\*

ESI1: Optimized structures of the products of the hydrogen activations via ketone (3-6) + H<sub>2</sub> + B(C<sub>6</sub>F<sub>5</sub>)<sub>3</sub> tri-molecular reactions.

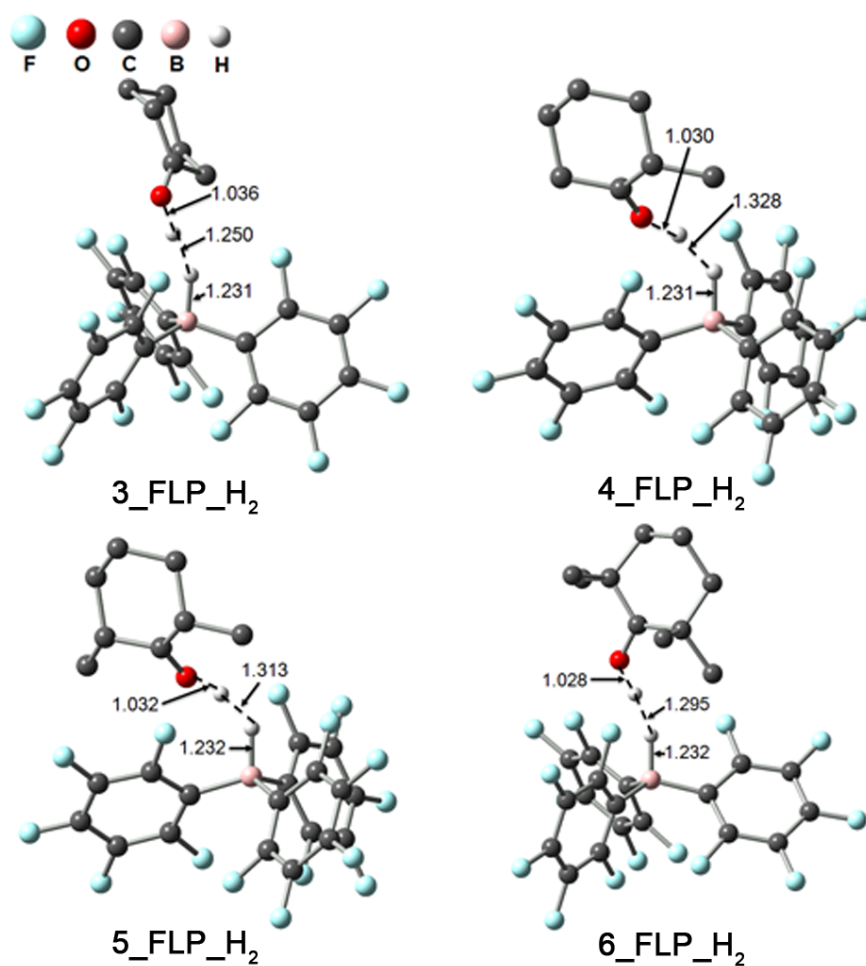

Fig. S1 M05-2X/6-31G(d,p) optimized structures of the zwitterionic products in the hydrogen activation via the FLP of ketones (3-6) with B(C<sub>6</sub>F<sub>5</sub>)<sub>3</sub>. All distances are in Å. Trivial hydrogen atoms are omitted for clarity.

### ESI2: Optimized structures of the H-bond and alkoxide complexes involved in the hydrogenations of ketones (4-6).

In the Fig. S2, we use  $1\_XOH_Y$  and  $1\_XO\_H_Y$  ( $X=3-6$ ;  $Y=ax$  or  $eq$ ) to denote the H-bond alcohol complexes between **1** and alcohols  $XOH_Y$  and the alkoxide complexes with broken O-H bonds.

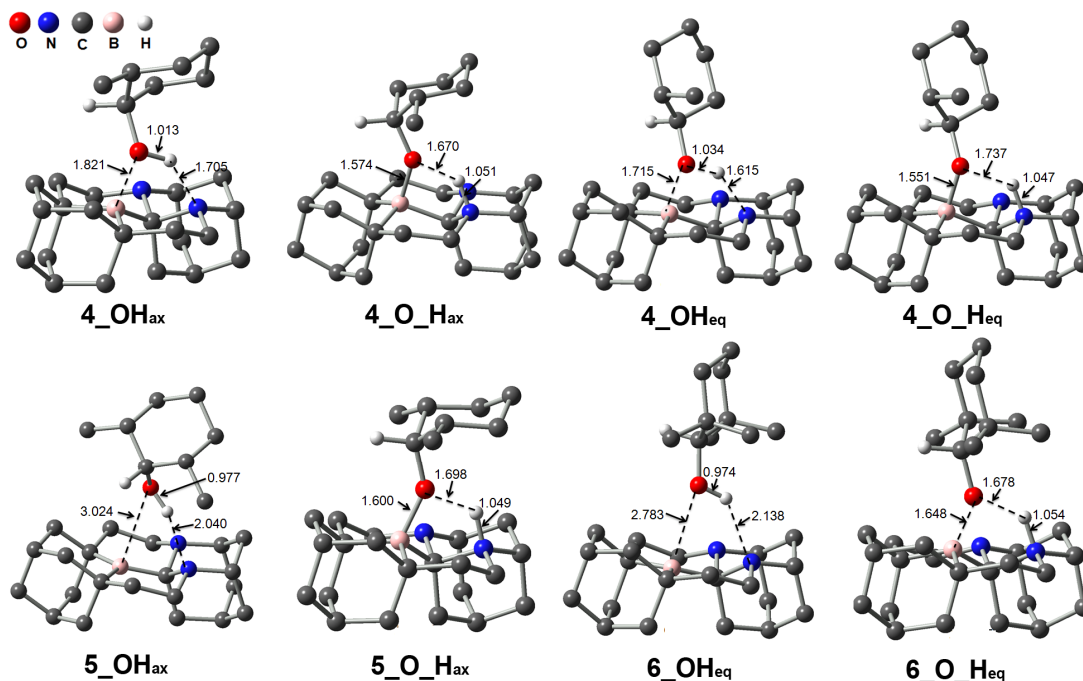

Fig. S2 Optimized structures of the H-bond and alkoxide complexes involved in the hydrogenations of ketones (4-6). All distances are in Å. Trivial hydrogen atoms are omitted for clarity.

### ESI3. Optimized structures of alkoxide complexes involved in benzophenone (**8**) hydrogenations catalyzed by **2** and **7**.

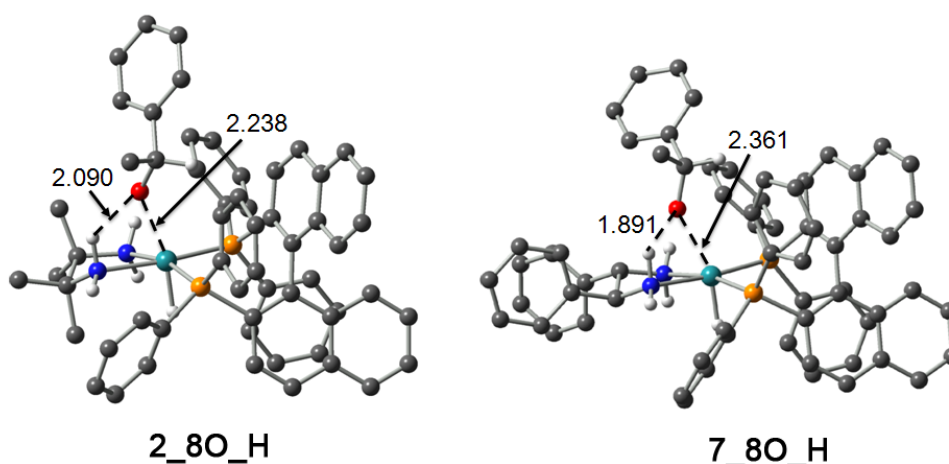

Fig. S3 The optimized structures of the alkoxide complexes involved in **8** (benzophenone) hydrogenations catalyzed by **2** and **7**. All distances are in Å. Trivial hydrogen atoms are omitted for clarity.

**ESI4. Vibration modes of the optimized transition states, corresponding to the imaginary frequencies.**

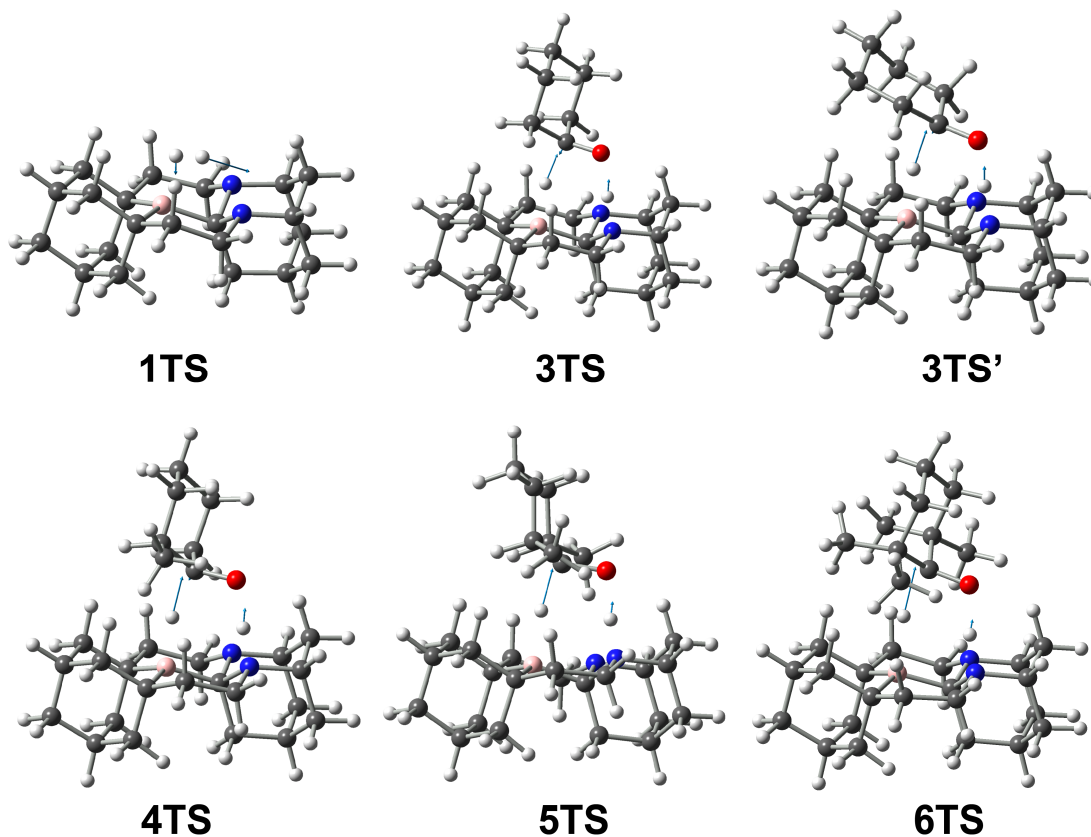

Fig. S4 The vibration modes of the optimized transition states at the level of M05-2X/6-31G(d,p).

**ESI5. The energetic information of some important stationary points.**

**1**

M05-2X/6-31G(d,p):

$E(\text{RM052X+HF-M052X}) = -953.251823$

Zero-point correction= 0.508044

Thermal correction to Energy= 0.524436

Thermal correction to Enthalpy= 0.525381

Thermal correction to Gibbs Free Energy= 0.467204

M05-2X/6-311++G(2d,p)//M05-2X/6-31G(d,p)

Total free energy in solution (THF): with all non electrostatic terms (a.u.) = -953.446583

**H<sub>2</sub>**

M05-2X/6-31G(d,p):

$E(\text{RM052X+HF-M052X}) = -1.167737697$   
Zero-point correction= 0.010293  
Thermal correction to Energy= 0.012653  
Thermal correction to Enthalpy= 0.013597  
Thermal correction to Gibbs Free Energy= -0.00119

M05-2X/6-311++G(2d,p)//M05-2X/6-31G(d,p)

Total free energy in solution (THF): with all non electrostatic terms (a.u.) = -1.165804

### 3

M05-2X/6-31G(d,p):

$E(\text{RM052X+HF-M052X}) = -309.857203$   
Zero-point correction= 0.153573  
Thermal correction to Energy= 0.160005  
Thermal correction to Enthalpy= 0.16095  
Thermal correction to Gibbs Free Energy= 0.123214

M05-2X/6-311++G(2d,p)//M05-2X/6-31G(d,p)

Total free energy in solution (THF): with all non electrostatic terms (a.u.) = -309.936848

### 4

M05-2X/6-31G(d,p):

$E(\text{RM052X+HF-M052X}) = -349.1706483$   
Zero-point correction= 0.182246  
Thermal correction to Energy= 0.190056  
Thermal correction to Enthalpy= 0.191001  
Thermal correction to Gibbs Free Energy= 0.150253

M05-2X/6-311++G(2d,p)//M05-2X/6-31G(d,p)

Total free energy in solution (THF): with all non electrostatic terms (a.u.) = -349.255907

### 5

M05-2X/6-31G(d,p):

$E(\text{RM052X+HF-M052X}) = -388.4837451$   
Zero-point correction= 0.21048  
Thermal correction to Energy= 0.219718  
Thermal correction to Enthalpy= 0.220662  
Thermal correction to Gibbs Free Energy= 0.176807

M05-2X/6-311++G(2d,p)//M05-2X/6-31G(d,p)

Total free energy in solution (THF): with all non electrostatic terms (a.u.) = -388.57465

## 6

M05-2X/6-31G(d,p):

E(RM052X+HF-M052X) = -467.102036

Zero-point correction= 0.266852

Thermal correction to Energy= 0.278917

Thermal correction to Enthalpy= 0.279861

Thermal correction to Gibbs Free Energy= 0.230264

M05-2X/6-311++G(2d,p)//M05-2X/6-31G(d,p)

Total free energy in solution (THF): with all non electrostatic terms (a.u.) = -467.207255

## 5RCP

M05-2X/6-31G(d,p):

E(RM052X+HF-M052X) = -1263.12734

Zero-point correction= 0.668214

Thermal correction to Energy= 0.690132

Thermal correction to Enthalpy= 0.691076

Thermal correction to Gibbs Free Energy= 0.622537

M05-2X/6-311++G(2d,p)//M05-2X/6-31G(d,p)

Total free energy in solution (THF): with all non electrostatic terms (a.u.) = -1263.393902

## DCP\_1

M05-2X/6-31G(d,p):

E(RM052X+HF-M052X) = -1263.122585

Zero-point correction= 0.663216

Thermal correction to Energy= 0.68713

Thermal correction to Enthalpy= 0.688074

Thermal correction to Gibbs Free Energy= 0.613163

M05-2X/6-311++G(2d,p)//M05-2X/6-31G(d,p)

Total free energy in solution (THF): with all non electrostatic terms (a.u.) = -1263.383102

## DCP\_2

M05-2X/6-31G(d,p):

E(RM052X+HF-M052X) = -1263.11522

Zero-point correction= 0.66244

Thermal correction to Energy= 0.687286

Thermal correction to Enthalpy= 0.68823

Thermal correction to Gibbs Free Energy= 0.607775

M05-2X/6-311++G(2d,p)//M05-2X/6-31G(d,p)

Total free energy in solution (THF): with all non electrostatic terms (a.u.) = -1263.3751

### 3IMA

M05-2X/6-31G(d,p):

E(RM052X+HF-M052X) = -1264.3151

Zero-point correction= 0.686058

Thermal correction to Energy= 0.710673

Thermal correction to Enthalpy= 0.711617

Thermal correction to Gibbs Free Energy= 0.634137

M05-2X/6-311++G(2d,p)//M05-2X/6-31G(d,p)

Total free energy in solution (THF): with all non electrostatic terms (a.u.) = -1264.5806

### 3TS

M05-2X/6-31G(d,p):

E(RM052X+HF-M052X) = -1264.298617

Zero-point correction= 0.682885

Thermal correction to Energy= 0.706043

Thermal correction to Enthalpy= 0.706987

Thermal correction to Gibbs Free Energy= 0.635175

Vibration Harmonic Frequencies: -532.8914 cm<sup>-1</sup>

M05-2X/6-311++G(2d,p)//M05-2X/6-31G(d,p)

Total free energy in solution (THF): with all non electrostatic terms (a.u.) = -1264.567073

### 3IMB

M05-2X/6-31G(d,p):

E(RM052X+HF-M052X) = -1264.3406

Zero-point correction= 0.687886

Thermal correction to Energy= 0.712449

Thermal correction to Enthalpy= 0.713393

Thermal correction to Gibbs Free Energy= 0.635505

M05-2X/6-311++G(2d,p)//M05-2X/6-31G(d,p)

Total free energy in solution (THF): with all non electrostatic terms (a.u.) = -1264.6043

### 4IMA

M05-2X/6-31G(d,p):

E(RM052X+HF-M052X) = -1303.63  
Zero-point correction= 0.714476  
Thermal correction to Energy= 0.740677  
Thermal correction to Enthalpy= 0.741621  
Thermal correction to Gibbs Free Energy= 0.659958

M05-2X/6-311++G(2d,p)//M05-2X/6-31G(d,p)

Total free energy in solution (THF): with all non electrostatic terms (a.u.) = -1303.89991

#### 4TS

M05-2X/6-31G(d,p):

E(RM052X+HF-M052X) = -1303.6033  
Zero-point correction= 0.711521  
Thermal correction to Energy= 0.736132  
Thermal correction to Enthalpy= 0.737076  
Thermal correction to Gibbs Free Energy= 0.662445  
Vibration Harmonic Frequencies: -801.4511cm<sup>-1</sup>

M05-2X/6-311++G(2d,p)//M05-2X/6-31G(d,p)

Total free energy in solution (THF): with all non electrostatic terms (a.u.) = -1303.8773

#### 4IMB

M05-2X/6-31G(d,p):

E(RM052X+HF-M052X) = -1303.65276  
Zero-point correction= 0.716423  
Thermal correction to Energy= 0.742419  
Thermal correction to Enthalpy= 0.743363  
Thermal correction to Gibbs Free Energy= 0.662936

M05-2X/6-311++G(2d,p)//M05-2X/6-31G(d,p)

Total free energy in solution (THF): with all non electrostatic terms (a.u.) = -1303.921183

#### 5IMA

M05-2X/6-31G(d,p):

E(RM052X+HF-M052X) = -1342.94231  
Zero-point correction= 0.742951  
Thermal correction to Energy= 0.77035  
Thermal correction to Enthalpy= 0.771294  
Thermal correction to Gibbs Free Energy= 0.68734

M05-2X/6-311++G(2d,p)//M05-2X/6-31G(d,p)

Total free energy in solution (THF): with all non electrostatic terms (a.u.) = -1343.21967

## 5TS

M05-2X/6-31G(d,p):

E(RM052X+HF-M052X) = -1342.8987

Zero-point correction= 0.739875

Thermal correction to Energy= 0.7659

Thermal correction to Enthalpy= 0.766845

Thermal correction to Gibbs Free Energy= 0.68931

Vibration Harmonic Frequencies: -1081.2198cm<sup>-1</sup>

M05-2X/6-311++G(2d,p)//M05-2X/6-31G(d,p)

Total free energy in solution (THF): with all non electrostatic terms (a.u.) = -1343.1826

## 5IMB

M05-2X/6-31G(d,p):

E(RM052X+HF-M052X) = -1342.963966

Zero-point correction= 0.743977

Thermal correction to Energy= 0.771668

Thermal correction to Enthalpy= 0.772613

Thermal correction to Gibbs Free Energy= 0.687732

M05-2X/6-311++G(2d,p)//M05-2X/6-31G(d,p)

Total free energy in solution (THF): with all non electrostatic terms (a.u.) = -1343.237649

## 6IMA

M05-2X/6-31G(d,p):

E(RM052X+HF-M052X) = -1421.55946

Zero-point correction= 0.800354

Thermal correction to Energy= 0.830388

Thermal correction to Enthalpy= 0.831332

Thermal correction to Gibbs Free Energy= 0.742422

M05-2X/6-311++G(2d,p)//M05-2X/6-31G(d,p)

Total free energy in solution (THF): with all non electrostatic terms (a.u.) = -1421.85015

## 6TS

M05-2X/6-31G(d,p):

E(RM052X+HF-M052X) = -1421.5003

Zero-point correction= 0.796591

Thermal correction to Energy= 0.825247

Thermal correction to Enthalpy= 0.826191



Thermal correction to Gibbs Free Energy= 0.74424

Vibration Harmonic Frequencies: -1252.9938cm<sup>-1</sup>

M05-2X/6-311++G(2d,p)//M05-2X/6-31G(d,p)

Total free energy in solution (THF): with all non electrostatic terms (a.u.) = -1421.7997

### 6IMB

M05-2X/6-31G(d,p):

E(RM052X+HF-M052X) = -1421.578903

Zero-point correction= 0.801248

Thermal correction to Energy= 0.831273

Thermal correction to Enthalpy= 0.832217

Thermal correction to Gibbs Free Energy= 0.744117

M05-2X/6-311++G(2d,p)//M05-2X/6-31G(d,p)

Total free energy in solution (THF): with all non electrostatic terms (a.u.) = -1421.867217

### 3TS'

M05-2X/6-31G(d,p):

E(RM052X+HF-M052X) = -1264.29222

Zero-point correction= 0.682477

Thermal correction to Energy= 0.705617

Thermal correction to Enthalpy= 0.706561

Thermal correction to Gibbs Free Energy= 0.635056

Vibration Harmonic Frequencies: -796.6519cm<sup>-1</sup>

M05-2X/6-311++G(2d,p)//M05-2X/6-31G(d,p)

Total free energy in solution (THF): with all non electrostatic terms (a.u.) = -1264.56157

### 3OH<sub>ax</sub>

M05-2X/6-31G(d,p):

E(RM052X+HF-M052X) = -311.06379

Zero-point correction= 0.177852

Thermal correction to Energy= 0.184546

Thermal correction to Enthalpy= 0.185491

Thermal correction to Gibbs Free Energy= 0.147738

M05-2X/6-311++G(2d,p)//M05-2X/6-31G(d,p)

Total free energy in solution (THF): with all non electrostatic terms (a.u.) = -311.14098

### 3OH<sub>eq</sub>

M05-2X/6-31G(d,p):

E(RM052X+HF-M052X) = -311.0635916

Zero-point correction= 0.177344  
Thermal correction to Energy= 0.184184  
Thermal correction to Enthalpy= 0.185128  
Thermal correction to Gibbs Free Energy= 0.147  
M05-2X/6-311++G(2d,p)//M05-2X/6-31G(d,p)  
Total free energy in solution (THF): with all non electrostatic terms (a.u.) = -311.142108

### **4OH<sub>ax</sub>**

M05-2X/6-31G(d,p):  
E(RM052X+HF-M052X) = -350.37614  
Zero-point correction= 0.206022  
Thermal correction to Energy= 0.214214  
Thermal correction to Enthalpy= 0.215158  
Thermal correction to Gibbs Free Energy= 0.174147  
M05-2X/6-311++G(2d,p)//M05-2X/6-31G(d,p)  
Total free energy in solution (THF): with all non electrostatic terms (a.u.) = -350.45952

### **3OH<sub>eq</sub>**

M05-2X/6-31G(d,p):  
E(RM052X+HF-M052X) = -350.3735649  
Zero-point correction= 0.206213  
Thermal correction to Energy= 0.214324  
Thermal correction to Enthalpy= 0.215268  
Thermal correction to Gibbs Free Energy= 0.174355  
M05-2X/6-311++G(2d,p)//M05-2X/6-31G(d,p)  
Total free energy in solution (THF): with all non electrostatic terms (a.u.) = -350.458675

### **5OH<sub>ax</sub>**

M05-2X/6-31G(d,p):  
E(RM052X+HF-M052X) = -389.68819  
Zero-point correction= 0.234608  
Thermal correction to Energy= 0.2442  
Thermal correction to Enthalpy= 0.245144  
Thermal correction to Gibbs Free Energy= 0.20111  
M05-2X/6-311++G(2d,p)//M05-2X/6-31G(d,p)  
Total free energy in solution (THF): with all non electrostatic terms (a.u.) = -389.77835

### **6OH<sub>eq</sub>**

M05-2X/6-31G(d,p):  
E(RM052X+HF-M052X) = -468.3063187

Zero-point correction= 0.291104  
Thermal correction to Energy= 0.30322  
Thermal correction to Enthalpy= 0.304164  
Thermal correction to Gibbs Free Energy= 0.255327  
M05-2X/6-311++G(2d,p)//M05-2X/6-31G(d,p)  
Total free energy in solution (THF): with all non electrostatic terms (a.u.) = -468.412206

### **1\_3OH<sub>ax</sub>**

M05-2X/6-31G(d,p):  
E(RM052X+HF-M052X) = -1264.3479  
Zero-point correction= 0.688245  
Thermal correction to Energy= 0.711628  
Thermal correction to Enthalpy= 0.712572  
Thermal correction to Gibbs Free Energy= 0.640072  
M05-2X/6-311++G(2d,p)//M05-2X/6-31G(d,p)  
Total free energy in solution (THF): with all non electrostatic terms (a.u.) = -1264.608185

### **1\_3O\_H<sub>ax</sub>**

M05-2X/6-31G(d,p):  
E(RM052X+HF-M052X) = -1264.35  
Zero-point correction= 0.690154  
Thermal correction to Energy= 0.713267  
Thermal correction to Enthalpy= 0.714211  
Thermal correction to Gibbs Free Energy= 0.642358  
M05-2X/6-311++G(2d,p)//M05-2X/6-31G(d,p)  
Total free energy in solution (THF): with all non electrostatic terms (a.u.) = -1264.61

### **1\_3OH<sub>eq</sub>**

M05-2X/6-31G(d,p):  
E(RM052X+HF-M052X) = -1264.3511  
Zero-point correction= 0.688112  
Thermal correction to Energy= 0.711529  
Thermal correction to Enthalpy= 0.712473  
Thermal correction to Gibbs Free Energy= 0.6392  
M05-2X/6-311++G(2d,p)//M05-2X/6-31G(d,p)  
Total free energy in solution (THF): with all non electrostatic terms (a.u.) = -1264.6095

### **1\_3O\_H<sub>eq</sub>**

M05-2X/6-31G(d,p):  
E(RM052X+HF-M052X) = -1264.36

Zero-point correction= 0.690196  
Thermal correction to Energy= 0.713414  
Thermal correction to Enthalpy= 0.714358  
Thermal correction to Gibbs Free Energy= 0.641927  
M05-2X/6-311++G(2d,p)//M05-2X/6-31G(d,p)  
Total free energy in solution (THF): with all non electrostatic terms (a.u.) = -1264.62

### **1\_4OH<sub>ax</sub>**

M05-2X/6-31G(d,p):  
E(RM052X+HF-M052X) = -1303.6561  
Zero-point correction= 0.717687  
Thermal correction to Energy= 0.742464  
Thermal correction to Enthalpy= 0.743408  
Thermal correction to Gibbs Free Energy= 0.668254  
M05-2X/6-311++G(2d,p)//M05-2X/6-31G(d,p)  
Total free energy in solution (THF): with all non electrostatic terms (a.u.) = -1303.923

### **1\_4O\_H<sub>ax</sub>**

M05-2X/6-31G(d,p):  
E(RM052X+HF-M052X) = -1303.659473  
Zero-point correction= 0.71887  
Thermal correction to Energy= 0.743288  
Thermal correction to Enthalpy= 0.744232  
Thermal correction to Gibbs Free Energy= 0.670388  
M05-2X/6-311++G(2d,p)//M05-2X/6-31G(d,p)  
Total free energy in solution (THF): with all non electrostatic terms (a.u.) = -1303.93

### **1\_4OH<sub>eq</sub>**

M05-2X/6-31G(d,p):  
E(RM052X+HF-M052X) = -1303.6585  
Zero-point correction= 0.716559  
Thermal correction to Energy= 0.741435  
Thermal correction to Enthalpy= 0.742379  
Thermal correction to Gibbs Free Energy= 0.666437  
M05-2X/6-311++G(2d,p)//M05-2X/6-31G(d,p)  
Total free energy in solution (THF): with all non electrostatic terms (a.u.) = -1303.9247

### **1\_4O\_H<sub>eq</sub>**

M05-2X/6-31G(d,p):  
E(RM052X+HF-M052X) = -1303.661621

Zero-point correction= 0.718502  
Thermal correction to Energy= 0.7431  
Thermal correction to Enthalpy= 0.744044  
Thermal correction to Gibbs Free Energy= 0.669253  
M05-2X/6-311++G(2d,p)//M05-2X/6-31G(d,p)  
Total free energy in solution (THF): with all non electrostatic terms (a.u.) = -1303.93

### **1\_5OH<sub>ax</sub>**

M05-2X/6-31G(d,p):  
E(RM052X+HF-M052X) = -1342.9635  
Zero-point correction= 0.744428  
Thermal correction to Energy= 0.771907  
Thermal correction to Enthalpy= 0.772852  
Thermal correction to Gibbs Free Energy= 0.689163  
M05-2X/6-311++G(2d,p)//M05-2X/6-31G(d,p)  
Total free energy in solution (THF): with all non electrostatic terms (a.u.) = -1343.2388

### **1\_5O\_H<sub>ax</sub>**

M05-2X/6-31G(d,p):  
E(RM052X+HF-M052X) = -1342.96  
Zero-point correction= 0.747752  
Thermal correction to Energy= 0.773546  
Thermal correction to Enthalpy= 0.77449  
Thermal correction to Gibbs Free Energy= 0.697522  
M05-2X/6-311++G(2d,p)//M05-2X/6-31G(d,p)  
Total free energy in solution (THF): with all non electrostatic terms (a.u.) = -1343.23

### **1\_6OH<sub>eq</sub>**

M05-2X/6-31G(d,p):  
E(RM052X+HF-M052X) = -1421.579776  
Zero-point correction= 0.801487  
Thermal correction to Energy= 0.831259  
Thermal correction to Enthalpy= 0.832203  
Thermal correction to Gibbs Free Energy= 0.745819  
M05-2X/6-311++G(2d,p)//M05-2X/6-31G(d,p)  
Total free energy in solution (THF): with all non electrostatic terms (a.u.) = -1421.869494

### **1\_6O\_H<sub>eq</sub>**

M05-2X/6-31G(d,p):  
E(RM052X+HF-M052X) = -1421.561

|                                          |          |
|------------------------------------------|----------|
| Zero-point correction=                   | 0.804882 |
| Thermal correction to Energy=            | 0.833175 |
| Thermal correction to Enthalpy=          | 0.834119 |
| Thermal correction to Gibbs Free Energy= | 0.753009 |

M05-2X/6-311++G(2d,p)//M05-2X/6-31G(d,p)

Total free energy in solution (THF): with all non electrostatic terms (a.u.) = -1421.856876
